# Supplementary material for: Highly stable and bright fluorescent chlorinated polymer dots for cellular imaging
Source: Royal Society of Chemistry journal article supplement (doi:10.1039/c8nj05671d), 2019-01-01
Supplement: c8nj05671d1.pdf [file c8nj05671d1.pdf]

## Highly Stable and Bright Fluorescent Chlorinated Polymer Dots for Cellular Imaging

Daize Mo<sup>a,b</sup>, Zhe Chen<sup>c</sup>, Liang Han<sup>b</sup>, Hanjian Lai<sup>b</sup>, Pengjie Chao<sup>b</sup>, Qingwen Zhang<sup>a\*</sup>,  
Leilei Tian<sup>c\*</sup>, Feng He<sup>b\*</sup>

a. Institute of Chinese Medical Sciences, University of Macau 999078, Macao, P. R.  
China. E-mail: qwzhang@umac.mo

b. Department of Chemistry, Southern University of Science and Technology,  
Shenzhen, 518055, P. R. China. E-mail: hef@sustc.edu.cn

c. Department of Materials Science and Engineering, South University of Science  
and Technology, Shenzhen, 518055, P. R. China. E-mail: tianll@sustc.edu.cn

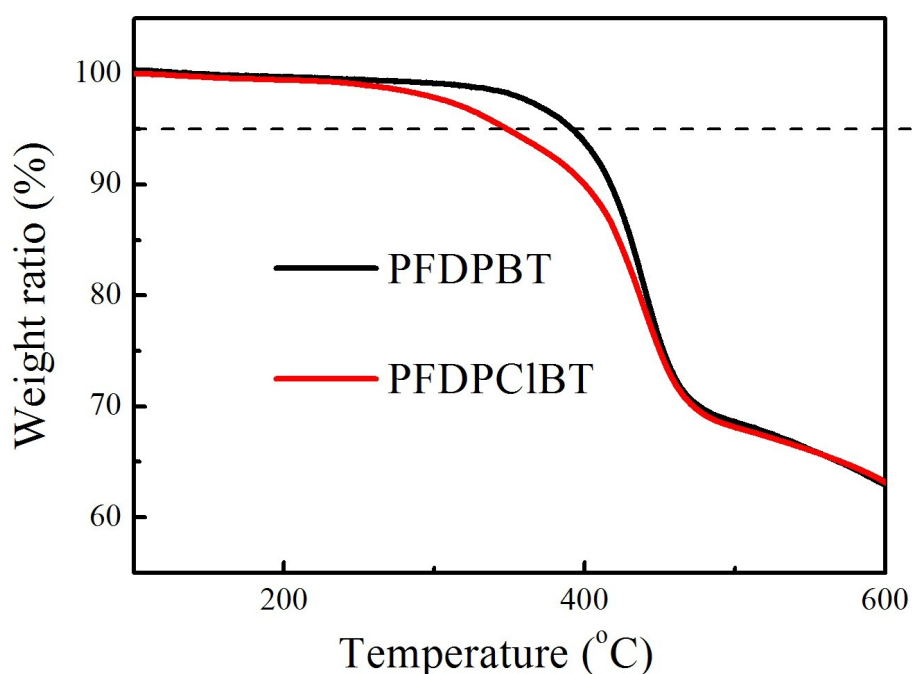

**Figure S1** Thermogravimetric analysis (TGA) of **PFDPBT** and **PFDPClBT** at a heating rate of 10 min<sup>-1</sup> °C in N<sub>2</sub>.

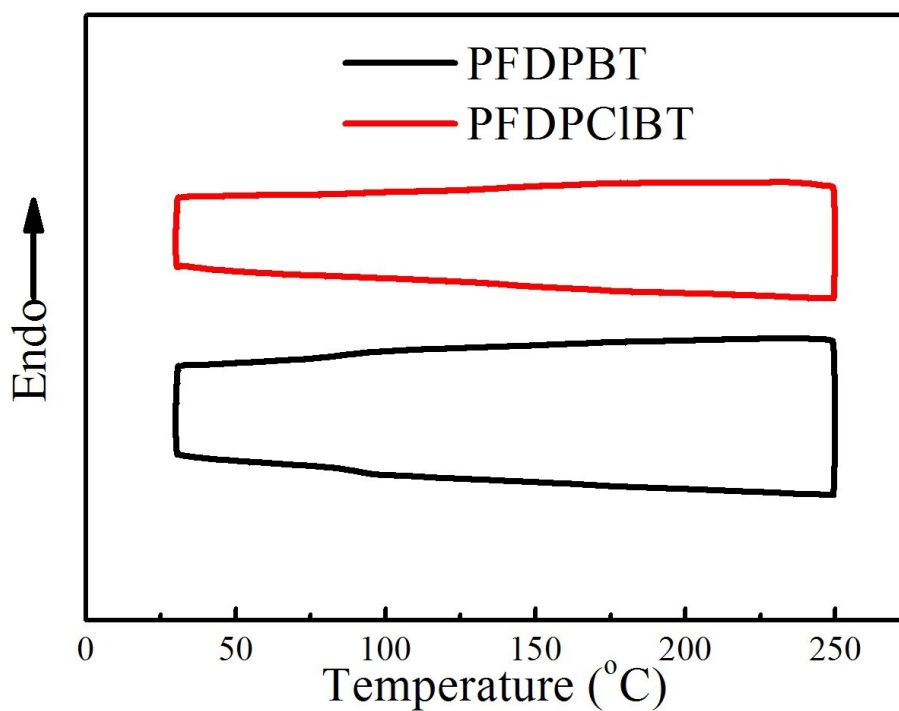

**Figure S2** DSC traces for **PFDPBT** and **PFDPCIBT** at a heating/cooling rate of 10 °C min<sup>-1</sup> in N<sub>2</sub>.

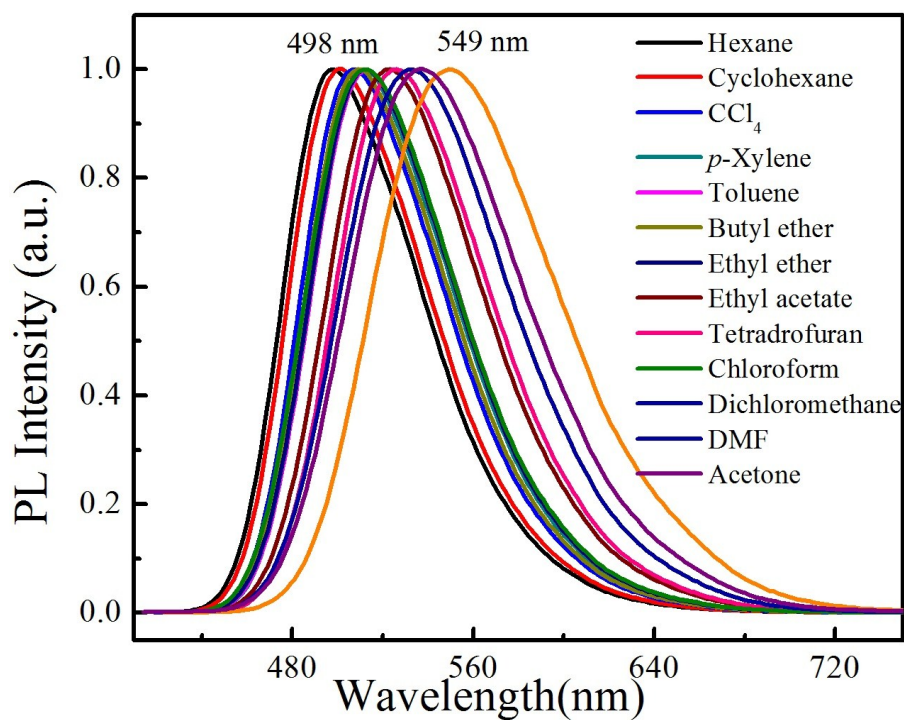

**Figure S3** PL spectra of the **PFDPBT** in different solvents with different polarity.

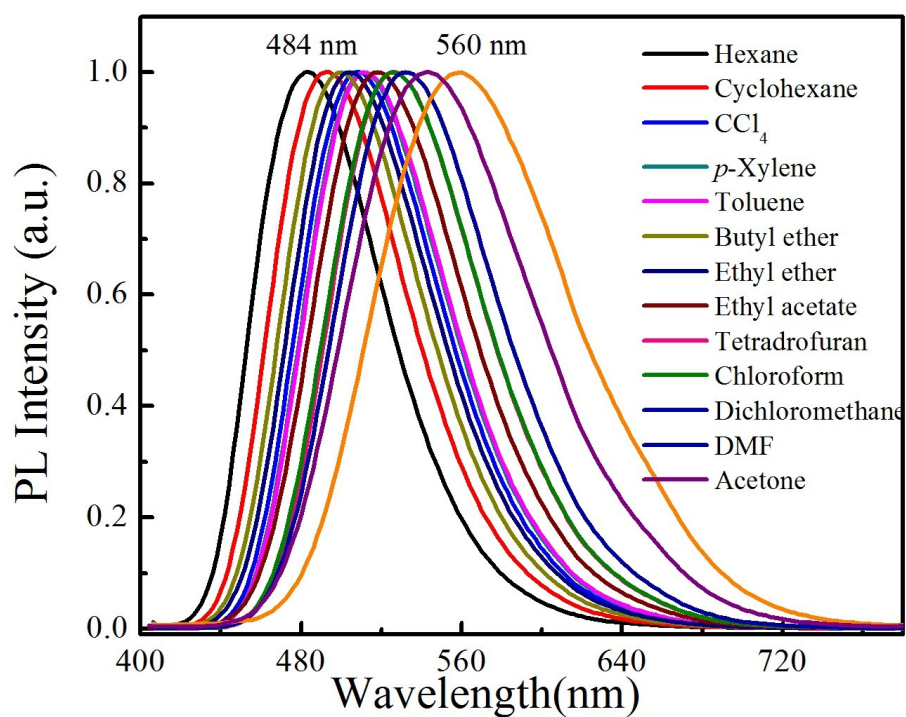

**Figure S4** PL spectra of the **PFDPICBT** in different solvents with different polarity.

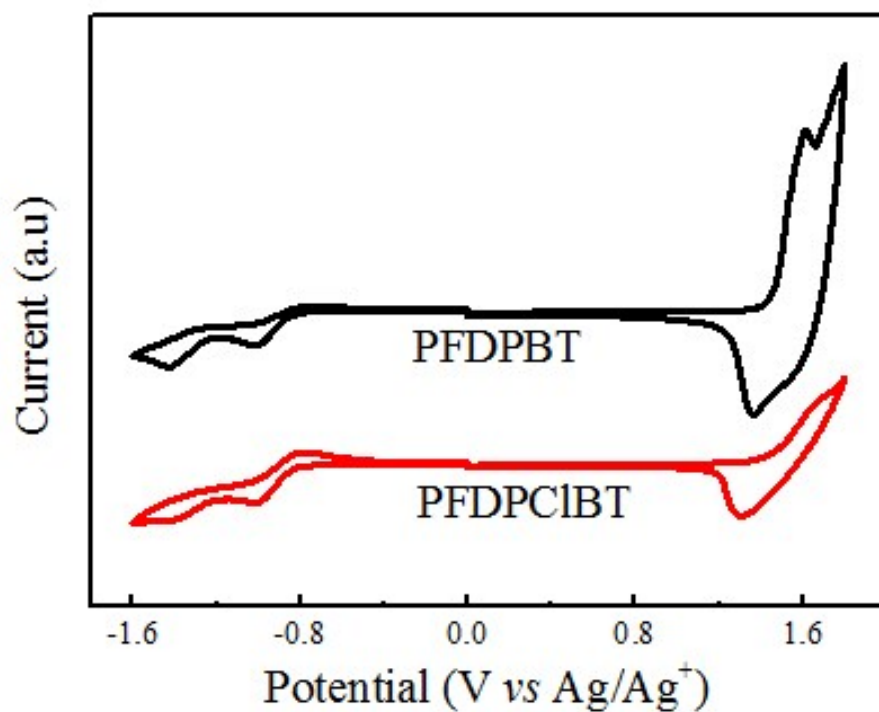

**Figure S5** Cyclic voltammograms of **PFDPBT** and **PFDPICBT** in the thin films drop-casted on glassy carbon electrode at a scan rate of 100 mV/s.
